# Supplementary material for: Epileptic encephalopathy linked to a DALRD3 missense variant that impairs tRNA modification
Source: PubMed Central journal article supplement — HGG Adv. 2024 Oct 31;6(1):100377. doi: 10.1016/j.xhgg.2024.100377 (PMC11615593; doi:10.1016/j.xhgg.2024.100377), 2024-10-31
Supplement: mmc1.pdf [file mmc1.pdf]

HGGA, Volume 6

## Supplemental information

### **Epileptic encephalopathy linked to a *DALRD3* missense variant that impairs tRNA modification**

**Kejia Zhang, Katharina Löhner, Henny H. Lemmink, Maartje Boon, Jenna M. Lentini, Naduni de Silva, and Dragony Fu**

## **Supplemental Information**

### **Supplemental Note: Case Reports**

The proband individual arrived in the Netherlands from Sudan via Egypt when he was almost 12 years old. Medical information on the individual's early childhood development is limited. The available information shows a history of normal pregnancy, delivery at term by uncomplicated caesarian section and normal neonatal period. Parents describe normal early development of the individual with the acquisition of language and walking. After a febrile episode at age 4 years, the individual started to have frequent epileptic seizures. There was a regression of his speech and motor functions.

EEG available from age six years during waking shows slowing of background activity in the left temporal area with superposition of spike and slow wave activity. An EEG at age eight years is described to be normal during waking. At that moment, the individual was being treated with valproic acid, at a serum level high within the therapeutic range. At age nine years, the EEG shows epileptic activity in the left temporal area with slow background activity, possibly also epileptic phenomena in the right temporal area. An EEG at age 13 years shows a diffuse encephalopathic pattern with multifocal epileptic phenomena, increasing during sleep with a temporal predominance on the right more than the left side, sometimes correlating with clinical phenomena.

The individual continues to have focal seizures with impaired awareness: tonic posturing of his right arm and rotation of the head and eyes towards the right side, shaking, crying, and sometimes vomiting with a duration of 30 seconds to one minute. The postictal phase lasts one to two minutes. He also has seizures lasting 5 seconds with a spasm of both arms and a scream. Sometimes the seizures generalize to bilateral clonic seizures. The seizures occur daily to weekly in clusters of one to seven seizures, a cluster lasting from one and a half hour to one and a half day. Despite treatment with various anti-epileptic drugs in therapeutic doses, the

individual has always had at least several epileptic seizures per month. Medication used was valproic acid, clobazam, lamotrigine, levetiracetam, also in combination.

### **Whole-exome sequencing**

The raw sequencing data was processed using our in-house developed pipeline, as described previously<sup>1</sup>. The resulting Vcf files were uploaded into the Cartagena/Alissa clinical informatics platform (version 5.1.4, Agilent Technologies). Variant selection, analysis and classification were performed as previously described<sup>2</sup>. First, quality filtering of the called variants was performed, excluding all those with a read depth 0.1% in the population databases were excluded from further analysis as they are considered benign. After filtering, variants were evaluated for their potential pathogenicity using in silico prediction software tools that are part of the Alamut Batch software (version 2.12; Interactive Biosoftware, Rouen, France), including SIFT, PolyPhen-2, MutationTaster, AlignGVGD, PhyloP and Grantham distance and four different splice site prediction programs (NNsplice, MaxEntScan, GeneSplicer and SpliceSiteFinder-Like). Variants were classified as “likely benign” (LB, class 2), “variant of uncertain significance” (VUS, class 3), “likely pathogenic” (LP, class 4) or “pathogenic” (P, class 5), largely based on ACMG guidelines<sup>3</sup>. In addition, we searched for scientific literature (PubMed and databases) that report identical or similar gene variants, including the Human Genome Mutation Database (HGMD) and ClinVar, for known (likely) pathogenic variants reported in patients.

### **Tissue culture**

The DALRD3 R517C fibroblast cells were obtained by skin biopsy from the identified patient. The wildtype human fibroblast cell line was previously described and obtained from a healthy patient<sup>4</sup>. The 293T human embryonic cell line was obtained from ATCC (CRL-3216). Fibroblast and 293T cell lines were cultured in Dulbecco’s Minimal Essential Medium (DMEM)

supplemented with 10% fetal bovine serum (FBS), 1X penicillin and streptomycin (ThermoFisher), and 1X Glutamax (Gibco) at 37 °C with 5% CO<sub>2</sub>. Cells were passaged every 3 days with 0.25% Trypsin.

### **Western blotting of patient cell samples**

Fibroblast cell lysates were prepared by resuspending cells in hypotonic lysis buffer (20 mM HEPES pH 7.9, 2 mM MgCl<sub>2</sub>, 0.2 mM EGTA, 10% glycerol, 0.1 mM PMSF, 1 mM DTT) and incubation on ice for 5 minutes. The resuspended cells were subjected to three consecutive freeze-thaw cycles in liquid nitrogen and a 37 °C water bath. NaCl was added to the lysates to a final concentration of 0.4 M, incubated on ice for 5 minutes, and the lysates spun at 14,000 × g for 15 min at 4 °C. After centrifugation, the supernatant was collected, and flash frozen in liquid nitrogen before storage at -80 °C.

Cellular extracts and purified protein samples were fractionated on NuPAGE Bis-Tris polyacrylamide gels (Thermo Scientific) followed by transfer to Immobilon FL PVDF membrane (Millipore) for immunoblotting. Antibodies were against the following proteins : DALRD3 (MA1-21315, Thermo Fisher), FLAG (NC9261069, Thermo Fisher), and actin (CST). Primary antibodies were detected using IRDye 800CW Goat anti-Mouse IgG (SA5-35521, Thermo Fisher) or Rabbit (SA5-35571, Thermo Fisher) or IRDye 680RD Goat anti-Mouse IgG (926-68070, LI-COR Biosciences) or goat anti-Rabbit IgG (925-68071). Immunoblots were scanned and quantified using direct infrared fluorescence via the Odyssey System and Image Studio software (LI-COR Biosciences).

### **Primer extension analysis**

Total RNA from human cells was extracted and purified using TRIzol LS reagent (Thermo Fisher). Primer extension was performed as previously described<sup>5</sup>. Briefly, 3 µg of total RNA was pre-annealed with a 5'-<sup>32</sup>P-radiolabelled oligonucleotide complementary to tRNA-Arg-

UCU or CCU. The mixture was heated at 95 °C for 3 minutes followed by slow cooling to 45 °C. After cooling, 14 µl of extension mix (0.12 µl of avian myeloblastosis virus reverse transcriptase (Promega), 2.8 µl 5X RT buffer, 1.12 µl 1 mM dNTPs, RNase-free water to 14 µl) was added to each reaction and incubated at 45 °C for 1 hour. Samples were mixed with 2x formamide denaturing dye, heated to 95 °C for 3 minutes and resolved on an 20% polyacrylamide, 7 M urea, 1xTBE denaturing gel. Phosphorimaging was performed on an Azure Sapphire phosphorimager and analyzed using NIH ImageJ software.

### **Transient transfections and protein-RNA purifications.**

293T cells were transfected via calcium phosphate transfection method. Briefly,  $2 \times 10^6$  cells were seeded on 100 × 20 mm tissue culture grade plates (Corning) followed by transfection with 20 µg of plasmid DNA. After 48 hours post-transfection, cells were dissociated from the plate using trypsin, harvested at 700 × g for 5 minutes followed by washing with PBS. Cell pellets were resuspended in 0.5 mL of hypotonic lysis buffer (20 mM HEPES pH 7.9, 2 mM MgCl<sub>2</sub>, 0.2 mM EGTA, 10% glycerol, 0.1 mM PMSF, 1 mM DTT). Cells were kept on ice for 5 minutes followed by three freeze-thaw cycles in liquid nitrogen and a 37 °C water bath. NaCl was added to the lysates to a final concentration of 0.4 M, incubated on ice for 5 minutes and the lysates spun at 14,000 × g for 15 min at 4 °C. After centrifugation, 500 µl of the lysate was removed and diluted with an equal volume of hypotonic lysis buffer containing 0.2% NP-40. Cell lysates were flash frozen in liquid nitrogen and stored at -80 °C.

FLAG-tagged proteins were purified by incubating whole cell lysates with 50 µl of MonoRab Anti-DYKDDDDK Magnetic Beads (GenScript) for two hours at 4 °C. Magnetic resin was washed three times with 1X HLB200 (20 mM HEPES pH 7.9, 2 mM MgCl<sub>2</sub>, 0.2 mM EGTA, 10% glycerol, 0.1% NP-40, 200 mM NaCl, 0.1 mM PMSF, 1 mM DTT). Proteins were eluted by resuspending resin in 1X NuPAGE LDS Sample Buffer supplemented with 50 mM DTT and heating at 95 °C for 5 minutes. Input lysates and purified proteins were fractionated on a

NuPAGE Bis-Tris PAGE (ThermoFisher) and transferred to Immobilon-FL PVDF Membrane (Millipore Sigma). Immunoblotting was performed as described above. The percent METTL2 co-purification was determined by dividing the METTL2 signal in the DALRD3 purification by the total amount of METTL2 in the starting extract after normalization to the total amount of DALRD3 purified.

For RNA copurification analysis, the resin was resuspended in 100  $\mu$ L of Molecular Biology Grade RNase-free water (Corning). 15  $\mu$ L of the resuspended resin was taken for immunoblotting analysis where the beads were mixed with 5  $\mu$ L of 4X NuPAGE LDS Sample Buffer supplemented with 50 mM DTT and heating at 95 °C for 5 minutes prior to loading onto a NuPAGE Bis-Tris PAGE (ThermoFisher). RNA extraction followed the TRizol LS RNA extraction protocol (Invitrogen). Recovery control RNA (20 ng) was added to the purified bead samples. RNA was resuspended in 10  $\mu$ L of RNase-free water and loaded onto a 10% polyacrylamide, 7 M urea gel. The gel was then stained with SYBR Gold nucleic acid stain (Invitrogen) to visualize RNA. The amount of RNA co-purified with DALRD3 was determined by dividing the tRNA signal in the DALRD3 purification by the total amount of tRNA signal in the starting extract after normalization to the total amount of DALRD3 purified.

### **Ethics approval and consent to participate**

IRB of University Medical Centre of Groningen gave ethical approval for this work. The patient and family provided consent for participation in the study and publication of the results.

### **Availability of data and materials**

All data and materials are available upon request.

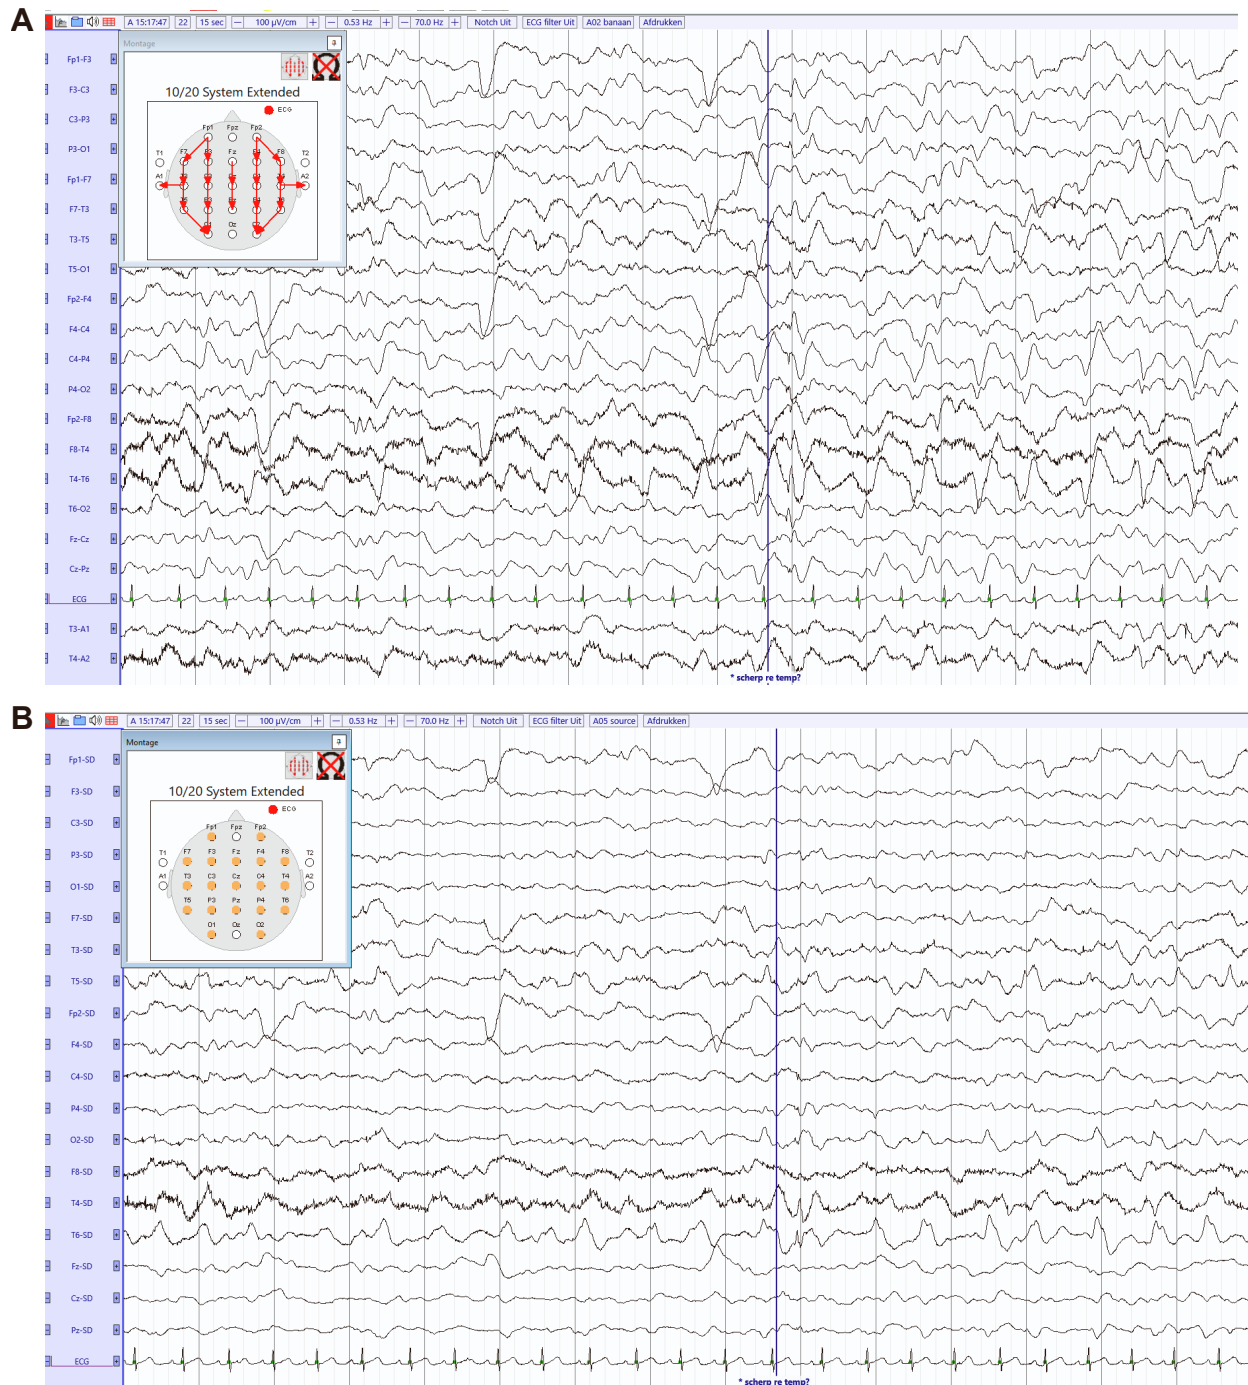

**Supplemental Figure 1.** Epileptiform discharges detected at the right temporal electrode during EEG testing of the patient in this study. (A) Bipolar and (B) Laplacian montages.

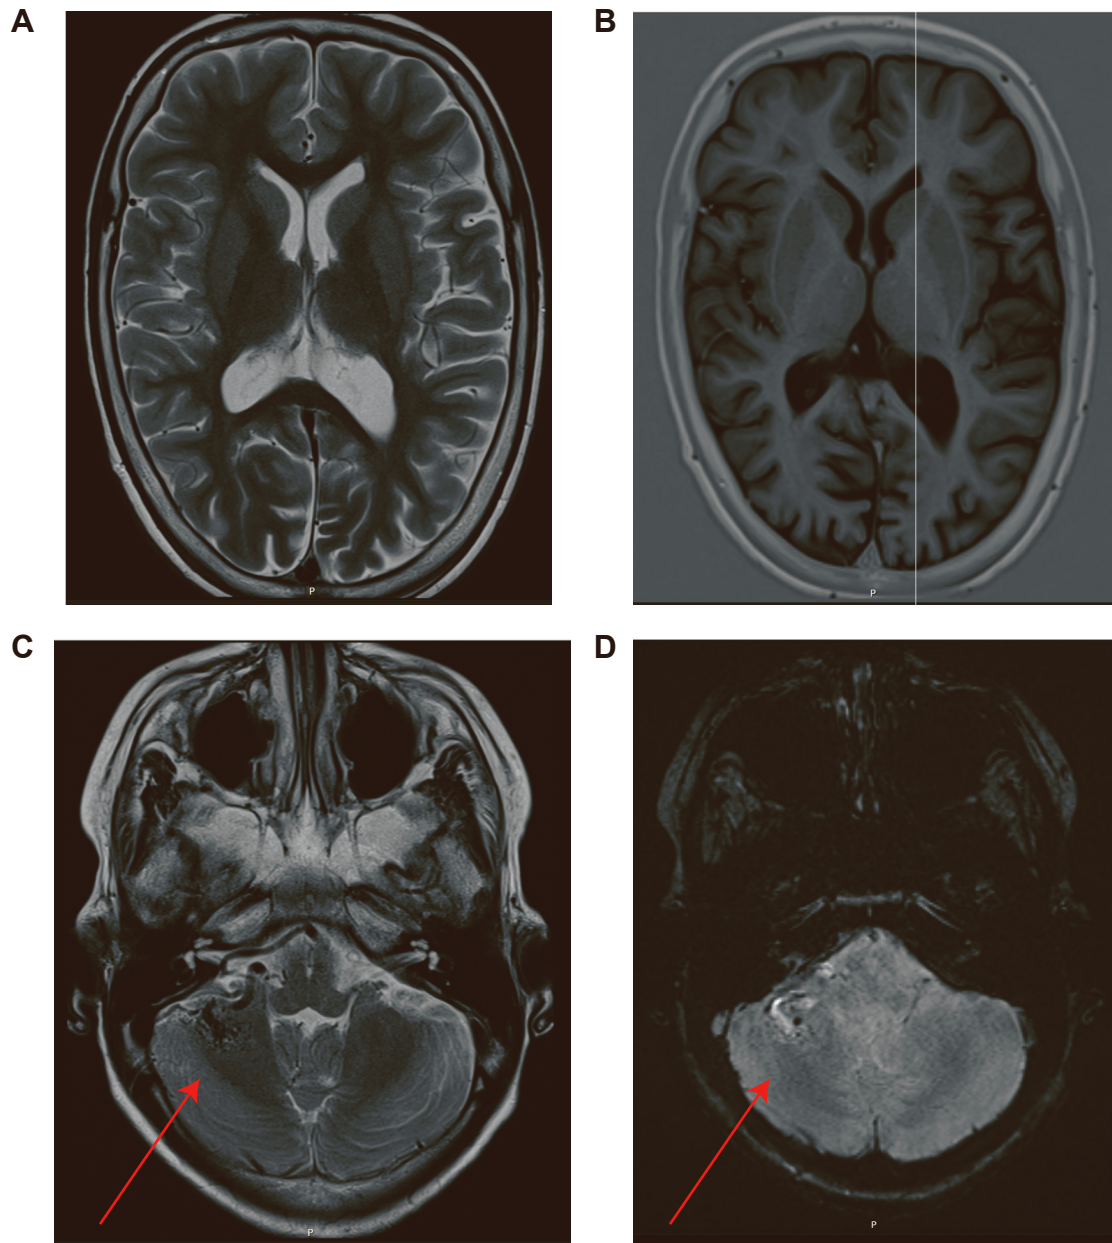

**Supplemental Figure 2.** The individual in this study exhibits enlargement of sulci and ventricular system along with a right cerebellar arteriovenous malformation. (A) MRI at 13 years of age; transversal T2 TSE. (B) MRI; transversal T1 TSE (C) Transversal T2 TSE weighted MRI scan. (D) Transversal SWI (susceptibility weighted) scan. Arrow points at the right cerebellar arteriovenous malformation.



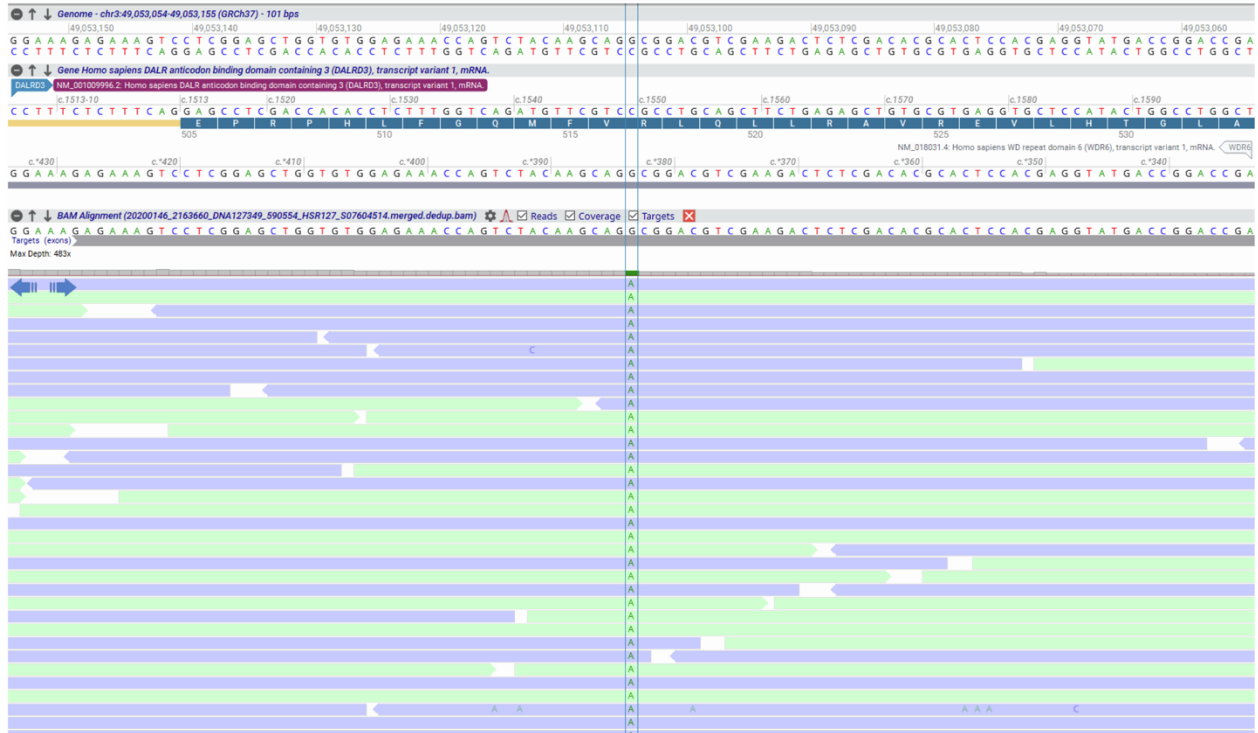

**Supplemental Figure 3.** Identification of a homozygous missense variant in the *DALRD3* gene of the patient in this study. Whole exome sequence analysis output.

# Control

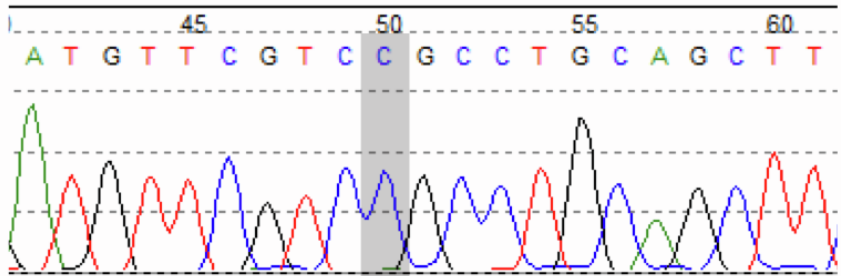

# Patient

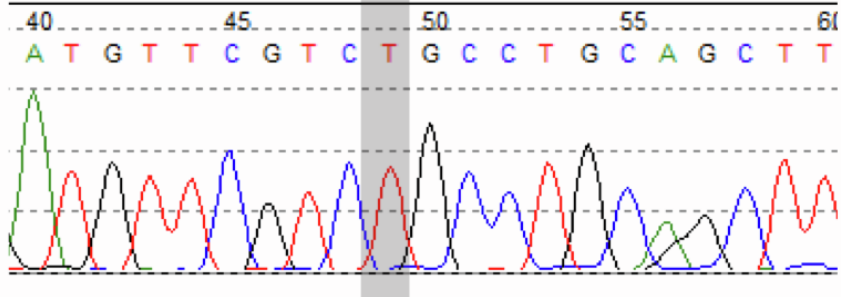

**Supplemental Figure 4.** Sanger sequencing chromatograms of a healthy, control individual and the patient characterized in this study.

### A Mother

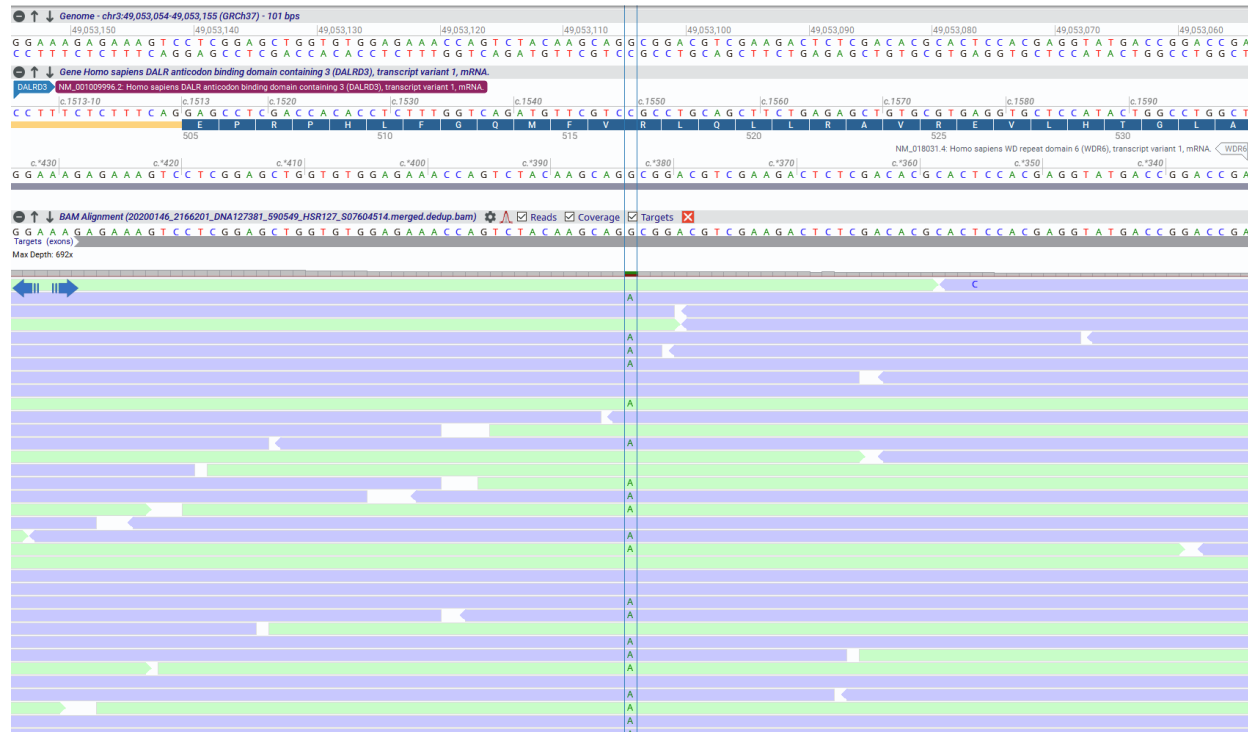

### B Father

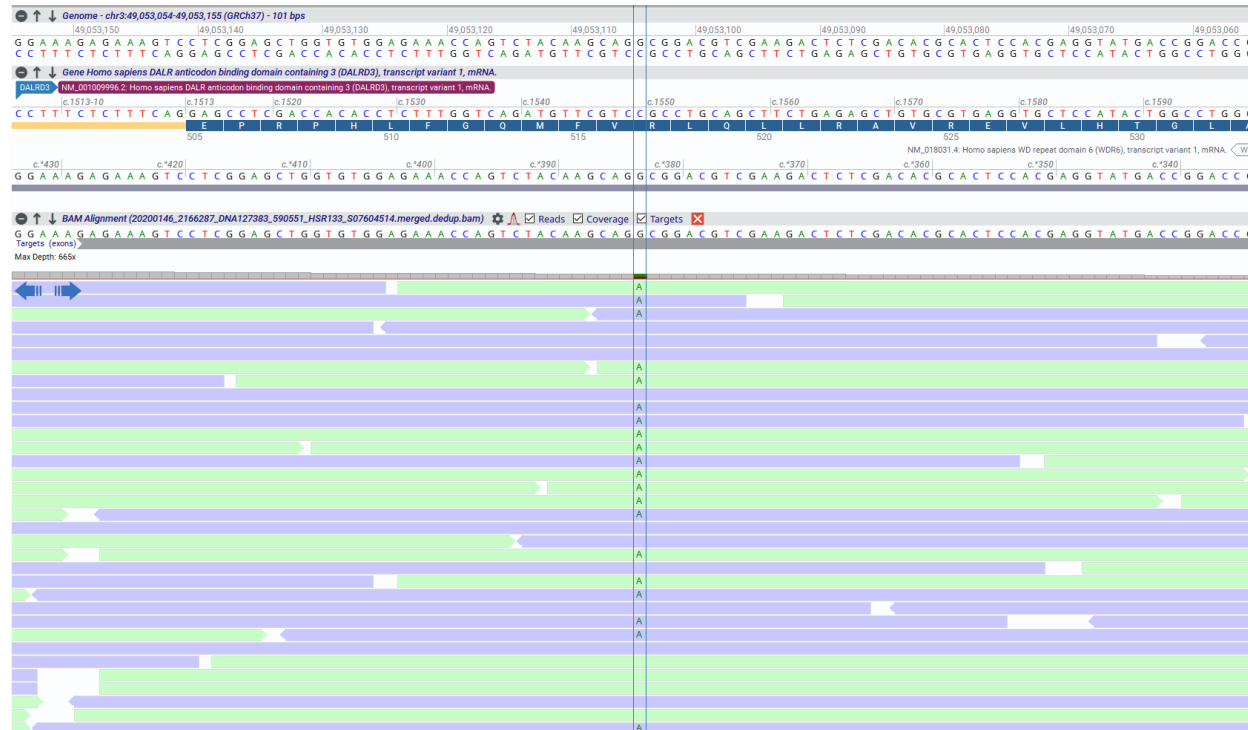

**Supplemental Figure 5.** The mother and father of the affected patient in this study are heterozygous carriers of the *DALRD3* missense variant. Whole exome sequence analysis of the (A) Mother and (B) Father.

| Analysis          | SIFT        | PolyPhen          | CADD               | REVEL                  | MetaLR   | Mutation taster |
|-------------------|-------------|-------------------|--------------------|------------------------|----------|-----------------|
| Score             | 0           | 1                 | 31                 | 0.906                  | 0.871    | 82 40           |
| Predicted outcome | Deleterious | Probably damaging | Likely deleterious | Likely disease causing | Damaging | Deleterious     |

**Supplemental Figure 6.** Scores and predicted outcomes for the R517C variant based upon the indicated pathogenicity prediction algorithms.

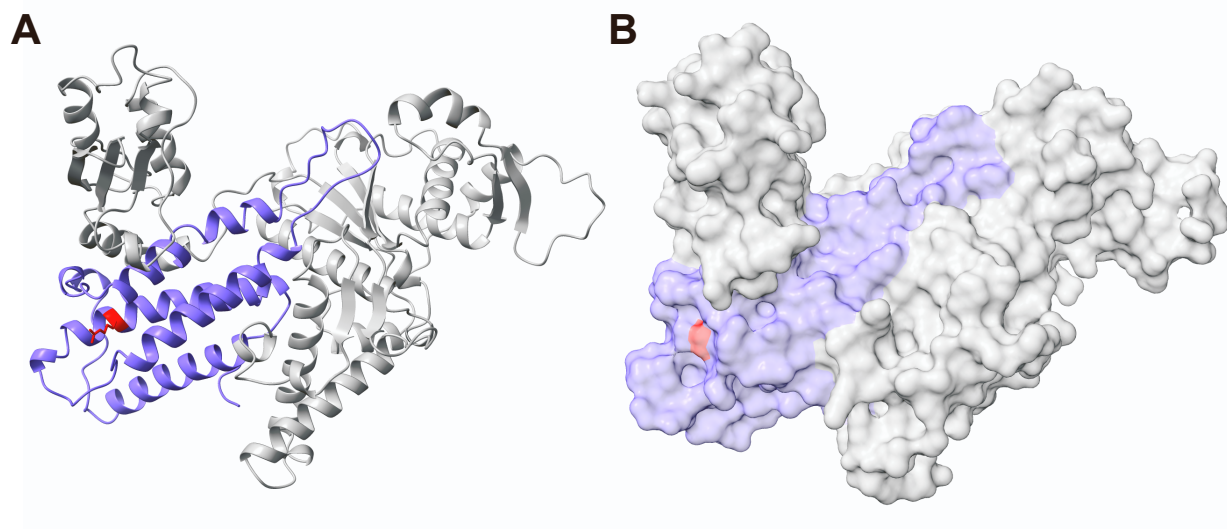

**Supplemental Figure 7.** (A) AlphaFold model of human DALRD3. The DALR anticodon binding domain is represented in violet and the R517 residue noted in red. (B) Surface plot of the predicted human DALRD3 structure with the R517 residue denoted in red.

## Supplemental References

1. Corsten-Janssen, N., Bouman, K., Diphooorn, J.C.D., Scheper, A.J., Kinds, R., El Mecky, J., Breet, H., Verheij, J., Suijkerbuijk, R., Duin, L.K., et al. (2020). A prospective study on rapid exome sequencing as a diagnostic test for multiple congenital anomalies on fetal ultrasound. *Prenat Diagn* *40*, 1300-1309. 10.1002/pd.5781.
2. Ghorbani, F., Alimohamed, M.Z., Vilacha, J.F., Van Dijk, K.K., De Boer-Bergsma, J., Fokkens, M.R., Lemmink, H., Sijmons, R.H., Sikkema-Raddatz, B., Groves, M.R., et al. (2022). Feasibility of Follow-Up Studies and Reclassification in Spinocerebellar Ataxia Gene Variants of Unknown Significance. *Front Genet* *13*, 782685. 10.3389/fgene.2022.782685.
3. Ellard, S., Colclough, K., Patel, K.A., and Hattersley, A.T. (2020). Prediction algorithms: pitfalls in interpreting genetic variants of autosomal dominant monogenic diabetes. *J Clin Invest* *130*, 14-16. 10.1172/JCI1133516.
4. Ramos, J., Proven, M., Halvardson, J., Hagelskamp, F., Kuchinskaya, E., Phelan, B., Bell, R., Kellner, S.M., Feuk, L., Thuresson, A.C., and Fu, D. (2020). Identification and rescue of a tRNA wobble inosine deficiency causing intellectual disability disorder. *RNA* *26*, 1654-1666. 10.1261/rna.076380.120.
5. Lentini, J.M., Alsaif, H.S., Faqeih, E., Alkuraya, F.S., and Fu, D. (2020). DALRD3 encodes a protein mutated in epileptic encephalopathy that targets arginine tRNAs for 3-methylcytosine modification. *Nat Commun* *11*, 2510. 10.1038/s41467-020-16321-6.
